# Supplementary material for: Reversal of β cell de-differentiation by a small molecule inhibitor of the TGFβ pathway
Source: eLife. 2014 Sep 16;3:e02809. doi: 10.7554/eLife.02809 (PMC4204634; doi:10.7554/eLife.02809)
Supplement: Supplementary file 1. — A list of all compounds used in the automated screen. (A) Listed are all growth factors used in the initial screen (Figure 4B) (B) Listed are all small molecules used in the secondary screen (Figure 4C). Working concentration (ng/ml for growth factors and µM for small molecules), percentage of Ucn3-GFP positive cells and p value of all replicates are listed for each compound. DOI: http://dx.doi.org/10.7554/eLife.02809.016 [file elife02809s001.xlsx]

## Sheet: Supplemenraty File 1A
Supplementary File 1A: Growth Factors, Set#1
Drug Name	Conc (ng/ml)	Average % Ucn3High	T.Test (Vs.No Factors)
Fresh Islets		22.99	0.00204268
No Factors		5.95917	1
Recombinant Human BMP9	10, 1	23.5425	0.000546586
Recombinant Human Artemin	10, 1	28.475	0.00508562
Recombinant Human FGF-8a	10, 1, 0.1	24.5375	0.00800367
Recombinant Rat FGF basic (FGF-2)	10, 1, 0.1	0.4875	0.0125726
Reg3a	200, 20	19.6183	0.01692
Recombinant Human FGF4	10, 1	18.4275	0.0191663
Recombinant Mouse Wnt5a	10, 1, 0.1	0.336667	0.0259598
Recombinant Human PDGFBB	10, 1	20.73	0.0289084
Recombinant Human TGF-ß1.2	10, 1, 0.1	0.57	0.0322519
Recombinant Human SCF	10, 1	19.9325	0.0467463
Recombinant Human Leptin	10, 1	0.1325	0.0580835
Recombinant Human FGF basic (145 aa)	10, 1, 0.1	1.24167	0.0586593
Recombinant Human IGFII	10, 1	0.3525	0.0670663
Recombinant Human BMP5	10, 1, 0.1	19.66	0.0708404
Recombinant Human EGF	10, 1, 0.1	19.6183	0.0755247
Recombinant Mouse IGFI	10, 1	0.7625	0.0887991
Recombinant Human IL15	10, 1, 0.1	1.97333	0.112786
Recombinant Human FGF6	10, 1, 0.1	1.87333	0.122113
Recombinant Human FGF basic 157 aa	10, 1	13.3975	0.123144
Recombinant Mouse GDF8/Myostatin	10, 1	1.4475	0.134126
Neurturin	100, 10	13.5933	0.145336
Recombinant Human IL3	10, 1, 0.1	11.275	0.194805
Recombinant Human GCSF	10, 1, 0.1	12.78	0.195748
Recombinant Mouse FGF basic (FGF2)	10, 1	19.01	0.196915
Human PDGF	10, 1	17.28	0.205108
Recombinant Human IL2	10, 1, 0.1	2.67667	0.222316
Recombinant Human IL9	10, 1	2.2975	0.225251
Recombinant Human IL5	10, 1, 0.1	2.625	0.238152
Recombinant Human TGFß1	10, 1, 0.1	10.3467	0.244882
Recombinant Human BMP4	10, 1	10.235	0.255553
Recombinant Human IL31	10, 1	2.54	0.278295
Recombinant Human FGF9	10, 1	14.375	0.281032
PBS + 0.1% BSA	1:10, 1:100	12.3475	0.281542
Recombinant Human FGF acidic (FGF1)	10, 1, 0.1	13.6317	0.336476
Recombinant Bovine FGF basic	10, 1	3.085	0.347293
Recombinant Human BDNF	10, 1	3.235	0.365187
Recombinant Human Cardiotrophin-1	10, 1	3.2175	0.368099
Recombinant Mouse TGFß RII Fc Chimera	10, 1	8.99	0.36966
Recombinant Mouse GMCSF	10, 1, 0.1	11.255	0.387901
Recombinant Amphibian TGF-ß5	10, 1, 0.1	9.045	0.411915
Recombinant Human MCSF	10, 1, 0.1	3.74333	0.427962
Recombinant Human TGFß2	10, 1, 0.1	9.045	0.438099
Recombinant Human NT4	10, 1	3.555	0.461978
Recombinant Mouse TGF-ß RII/Mouse Fc	10, 1	3.5275	0.470929
Recombinant Feline Flt-3 Ligand	10, 1	10.5625	0.47292
Recombinant Human Thrombopoietin	10, 1	3.6725	0.47524
Recombinant Human IL11	10, 1, 0.1	10.4067	0.492568
Recombinant Human PDGFDD	10, 1	8.925	0.513308
Recombinant Human FGF-8e	10, 1	4.1675	0.546793
4mM HCl 0.1%BSA	01:50:00	9.14	0.549447
Recombinant Human PDGFAA	10, 1	4.1425	0.576547
Recombinant Mouse Wnt3a	10, 1	4.275	0.58557
Recombinant Rat EGF	10, 1, 0.1	7.24833	0.598498
Recombinant Human Oncostatin M/OSM	10, 1, 0.1	4.50167	0.657097
Recombinant Human TGFß3	10, 1, 0.1	7.98167	0.672079
Recombinant Human Flt3Ligand	10, 1, 0.1	4.79333	0.716463
Recombinant Human IL6	10, 1, 0.1	5.01	0.727231
Bovine FGF acidic (FGF1)	10, 1, 0.1	4.76667	0.746253
Porcine TGFß1	10, 1, 0.1	7.32	0.757179
Recombinant Human GMCSF	10, 1, 0.1	6.95833	0.765498
Recombinant Human GDNF	10, 1	6.975	0.789031
Recombinant Human FGF20	10, 1	4.9725	0.800013
Recombinant Human IL7	10, 1, 0.1	6.50167	0.852714
Recombinant Human/Mouse/Rat Activin A	10, 1	6.71	0.8698
Recombinant Human IL4	10, 1, 0.1	5.46167	0.875306
Recombinant Human Amphiregulin	10, 1	5.6075	0.924326
BMP2/7	200, 20	6.17333	0.942647
Recombinant Human PDGFAB	10, 1	5.775	0.960383
Recombinant Human IGFI	10, 1	5.7925	0.963817
Supplementary File 1A: Growth Factors, Set#2
Drug Name	Conc (ng/ml)	Average % Ucn3High	T.Test (Vs.No Factors)
Fresh Islets		85.3469	1.38966e-16
neg control		8.195	1
Recombinant Human Artemin	10	30.5263	0.00151174
Recombinant Human BMP9	10	33.9388	0.00234916
Recombinant Human TGF-ß soluble Receptor III	100, 20	28.5133	0.00625087
Recombinant Human FGF8f	500, 100, 20	30.5	0.013235
Recombinant Human FGF10	500, 100, 20	28.7983	0.0146432
Recombinant Human PDGFCC	10, 1, 0.1	25.0467	0.037499
Recombinant Human BMP6	10, 1, 0.1	33.1867	0.042949
Recombinant Human BMP7	10, 1, 0.1	26.7267	0.0482812
Recombinant Mouse Lefty-1	500, 100, 20	21.1833	0.0520436
Recombinant Human FGF-22	500, 100, 20	21.42	0.0623965
Recombinant Canine KGF/FGF7	500, 100, 20	21.6417	0.0684311
Recombinant Human FGF-8a	50	20.295	0.0730962
Recombinant Mouse TGFß RI/ALK5-Fc Chimera	10, 1, 0.1	20.7283	0.0846783
Recombinant Mouse BMPR-IB/ALK-6/Fc Chimera	10, 1, 0.1	19.3167	0.124695
Recombinant Human TGFß-RII Fc Chimera	10, 1	22.72	0.128798
Recombinant Human FGF-17	10, 1, 0.1	19.34	0.145533
Recombinant Human Klotho (Klotho-a)	10, 1, 0.1	17.4667	0.147322
PBS + 0.1% BSA	1:10, , 1:50, 1:100	17.7967	0.152971
Recombinant Human Sonic Hedgehog NTerminus	500, 100, 20	17.625	0.154852
Recombinant Human BMPR-II Fc Chimera	10, 1, 0.1	17.2	0.16434
Recombinant Human FGF21	500, 100, 20	17.4683	0.178064
Recombinant Human FGF-16	10, 1	19.0775	0.188922
Recombinant Human CNTF	500, 100, 20	16.0483	0.224344
Recombinant Zebrafish BMP4	500, 100, 20	16.1967	0.228635
Recombinant Mouse FGF8b Isoform	500, 100, 20	17.966	0.235345
Recombinant Mouse FGF-8c	10, 1, 0.1	16.715	0.244525
Recombinant Human Follistatin	500, 100, 20	18.03	0.262682
Recombinant Human FGF19	10, 1, 0.1	15.1883	0.277992
Recombinant Human FGF23	10, 1, 0.1	15.515	0.284707
Recombinant Human BMP-3b/GDF-10	500, 100, 20	15.535	0.312556
Recombinant Human FGF acidic (FGF-1)/ßECGF	10, 1, 0.1	15.0333	0.34456
Recombinant Human FGF-12	500, 100, 20	13.3467	0.41069
Recombinant Human FGF basic 145 aa	500, 100, 20	13.2433	0.435781
Recombinant Rat FGFBP	10, 1	12.8425	0.558294
Recombinant Human FGF basic 146 aa	10, 1, 0.1	12.0567	0.59905
Recombinant Mouse DLL1 Fc Chimera	10, 1, 0.1	11.4667	0.601887
Recombinant Human FGF-5	10, 1	11.9125	0.645251
Reg3A	10	3.845	0.684948
PDGFBB	10	12.645	0.686941
Recombinant Mouse Cerberus 1 (DAND4)	10, 1, 0.1	6.33667	0.765805
Recombinant Human Endoglin/CD105	10, 1, 0.1	6.46667	0.788605
Recombinant Human FGF3	500, 100, 20	9.63833	0.816995
Recombinant Mouse Cripto	10, 1, 0.1	6.80667	0.822287
Recombinant Human HGF	10, 1, 0.1	6.88667	0.830268
Recombinant Mouse FGF acidic	10, 1, 0.1	9.32333	0.859547
Bovine FGF basic	10, 1, 0.1	9.115	0.883955
Recombinant Mouse PDGFCC	10, 1, 0.1	7.35833	0.891626
Recombinant Human BMP10	10, 1, 0.1	7.57333	0.920528
Recombinant Human BMP2	10, 1, 0.1	7.64	0.929594
Fgf4 human	100	8.92	0.945992
Fgf4 mouse		7.58	0.954111
Recombinant Human BMPRIA/ALK-3 Fc Chimera	10, 1, 0.1	8.22167	0.99651

## Sheet: Supplementary File 1B
Supplementary File 1B: Focused Small Molecules Screen
Drug Name	List	CAS No.	Conc (µM)	Average % Ucn3High	T.Test (Vs. DMSO only)
Fresh Islets				48.8337	9.19655e-21
DMSO only				2.31375	1
ALK5 Inhibitor II (RepSox)	BMP/TGFβ	446859-33-2	10, 1	42.4	1.1615e-14
ALK5 Inhibitor I (LY 364947)	BMP/TGFβ	396129-53-6	10, 1	7.755	0.00156965
Smad3 Inhibitor, SIS3	BMP/TGFβ	1009104-85-1	10, 1	6.875	0.00627717
SB-431542	BMP/TGFβ	301836-41-9	10, 1	8.285	0.0124445
BMP Inhibitor LDN-193189	BMP/TGFβ	1062368-24-4	10, 1	9.06	0.0270396
TGF-ß RI Kinase Inhibitor VI (ALK5 Inhibitor VII)	BMP/TGFβ	396129-53-6	10, 1	5.095	0.100855
SB-525334 (TGF-β RI Kinase Inhibitor VIII)	BMP/TGFβ	356559-20-1	10, 1	0	0.11375
SB-505124 (TGF-beta RI Inhibitor III)	BMP/TGFβ	694433-59-5	10, 1	0	0.11375
A 83-01 (TGF-beta RI Inhibitor IV)	BMP/TGFβ	909910-43-6	10, 1	0	0.11375
Casein Kinase I Inhibitor, D4476	BMP/TGFβ	301836-43-1	10, 1	0	0.11375
NVP-TAE684 - TAE 684	BMP/TGFβ	761439-42-3	10, 1	0	0.11375
AP26113	BMP/TGFβ	1197958-12-5	10, 1	5.555	0.12822
TGF-ß RI Kinase Inhibitor V (SD-208)	BMP/TGFβ	627536-09-8	10, 1	0.645	0.248536
AMPK Inhibitor, Compound C, Dorsomorphin	BMP/TGFβ	866405-64-3	10, 1	3.1	0.578782
PF-2341066 (Crizotinib)	BMP/TGFβ	877399-52-5	10, 1	1.515	0.586807
ALK5 inhibitor	BMP/TGFβ	259870-33-2	10, 1	1.645	0.635892
GSK1838705A	BMP/TGFβ	1116235-97-2	10, 1	2.94	0.698436
Pirfenidone (S-7701)	BMP/TGFβ	53179-13-8	10, 1	2.15	0.907503
FR 180204	BMP/TGFβ	865362-74-9	10, 1	2.205	0.939304
Danusertib (PHA-739358)	RET/GFRα3	827318-97-8	10, 1	25.2	5.23872e-11
VEGFR Tyrosine Kinase Inhibitor V	RET/GFRα3	396129-53-6	10, 1	10.79	0.000154601
S6K1 Inhibitor II, DG2	RET/GFRα3	871340-88-4	10, 1	6.67	0.00869297
AMG-706 (Motesanib)	RET/GFRα3	453562-69-1	10, 1	6.27	0.0271264
ELLAGIC ACID	RET/GFRα3	1953-04-4	10, 1	7.095	0.0358838
ZD6474 (Vandetanib)	RET/GFRα3	443913-73-3	10, 1	5.075	0.0650375
Ponatinib (AP24834)	RET/GFRα3	943319-70-8	10, 1	0	0.11375
Lestaurtinib (CEP-701)	RET/GFRα3	111358-88-4	10, 1	0	0.11375
Amuvatinib (MP-470, HPK 56)	RET/GFRα3	850879-09-3	10, 1	0	0.11375
SU11248 (Sunitinib)	RET/GFRα3	341031-54-7	10, 1	4.84	0.122667
BAY 73-4506	RET/GFRα3	755037-03-7	10, 1	0.635	0.245725
Mer RTK Inhibitor, UNC569	RET/GFRα3	1350547-65-7	10, 1	1.19	0.439822
TG101209	RET/GFRα3	936091-14-4	10, 1	1.665	0.660946
BAY 43-9006 (Sorafenib)	RET/GFRα3	284461-73-0	10, 1	1.84	0.742937
PP-1	RET/GFRα3	172889-26-8	10, 1	2	0.834914
XL-184 (Cabozantinib)	RET/GFRα3	849217-68-1	10, 1	2.095	0.876564
PP242	RET/GFRα3	1092351-67-1	10, 1	2.085	0.879854
RPI-1	RET/GFRα3	269730-03-2	10, 1	2.215	0.944583
Repaglinide	Diabetes	135062-02-1	10, 1	8.24	0.00197151
Tolbutamide	Diabetes	64-77-7	10, 1	7.015	0.00366534
KR-62436	Diabetes	761414-79-3	10, 1	9.98	0.00922489
Glipizide	Diabetes	29094-61-9	10, 1	6.015	0.018376
Troglitazone	Diabetes	97322-87-7	10, 1	5.645	0.0513385
Chlorpropamide	Diabetes	94-20-2	10, 1	5.225	0.0630691
GW 9508	Diabetes	885101-89-3	10, 1	5.36	0.0681385
Gliquidone	Diabetes	33342-05-1	10, 1	5.105	0.0685926
Saxagliptin (BMS-447118)	Diabetes	361442-04-8	10, 1	4.94	0.106847
SRT1720	Diabetes	1001645-58-4	10, 1	0	0.11375
JNK Inhibitor X, BI-78D3	Diabetes	883065-90-5	10, 1	0	0.11375
GSK1292263	Diabetes	1032823-75-8	10, 1	0	0.11375
Acetohexamide	Diabetes	968-81-0	10, 1	4.58	0.121037
CAY10591 (Sirtuin 1 Activator 3)	Diabetes	839699-72-8	10, 1	0.14	0.135685
Vildagliptin (LAF237 - Galvus)	Diabetes	274901-16-5	10, 1	5.255	0.153555
PIOGLITAZONE HYDROCHLORIDE	Diabetes	111025-46-8	10, 1	4.255	0.184024
ACARBOSE	Diabetes	56180-94-0	10, 1	0.465	0.201671
NVP DPP 728 dihydrochloride	Diabetes	247016-69-9	10, 1	0.5	0.210174
Harpagoside	Diabetes	19210-12-9	10, 1	0.69	0.257895
Phenformin hydrochloride (PhenF)	Diabetes	834-28-6	10, 1	0.695	0.262965
JNK Inhibitor XIII (SU 3327)	Diabetes	40045-50-9	10, 1	0.705	0.265926
S26948	Diabetes	353280-43-0	10, 1	0.71	0.267417
METFORMIN HYDROCHLORIDE	Diabetes	1115-70-4	10, 1	3.925	0.285817
SR 202	Diabetes	76541-72-5	10, 1	1.1	0.393139
Alogliptin (SYR-322)	Diabetes	850649-61-5	10, 1	3.53	0.411402
Ile-Pro-Ile (Diprotin A)	Diabetes	90614-48-5	10, 1	3.64	0.443119
Sitagliptin Phosphate	Diabetes	654671-78-0	10, 1	1.2	0.444013
NATEGLINIDE	Diabetes	105816-04-4	10, 1	3.395	0.457649
SALSALATE	Diabetes	552-94-3	10, 1	1.4	0.532412
Tolazamide	Diabetes	1156-19-0	10, 1	3.18	0.542703
Voglibose	Diabetes	83480-29-9	10, 1	1.525	0.581702
Rosiglitazone hydrochloride	Diabetes	122320-73-4	10, 1	1.545	0.601369
Glimepiride	Diabetes	93479-97-1	10, 1	1.59	0.609471
Ciglitizone	Diabetes	74772-77-3	10, 1	1.605	0.615392
Glibenclamide	Diabetes	10238-21-8	10, 1	3	0.627389
CRYPTOTANSHINONE	Diabetes	35825-57-1	10, 1	1.655	0.643612
Linagliptin (BI-1356)	Diabetes	668270-12-0	10, 1	2.98	0.646327
MIGLITOL	Diabetes	72432-03-2	10, 1	1.955	0.799692
DPPI 1c hydrochloride	Diabetes	866396-34-1	10, 1	2.68	0.816767
Lisinopril	Diabetes	1953-04-4	10, 1	2.21	0.941238
SIRT1 Inhibitor IV, (S)-35, sc-204279, CHIC-35	Diabetes	848193-72-6	10, 1	2.395	0.954226
GLICLAZIDE	Diabetes	21187-98-4	10, 1	2.345	0.983812
